# Supplementary material for: A humanized mouse model to study asthmatic airway inflammation via the human IL-33/IL-13 axis
Source: JCI journal article supplement (doi:10.1172/jci.insight.121580), 2018-10-23
Supplement: sd1 [file 1]

## SUPPLEMENTAL FIGURES

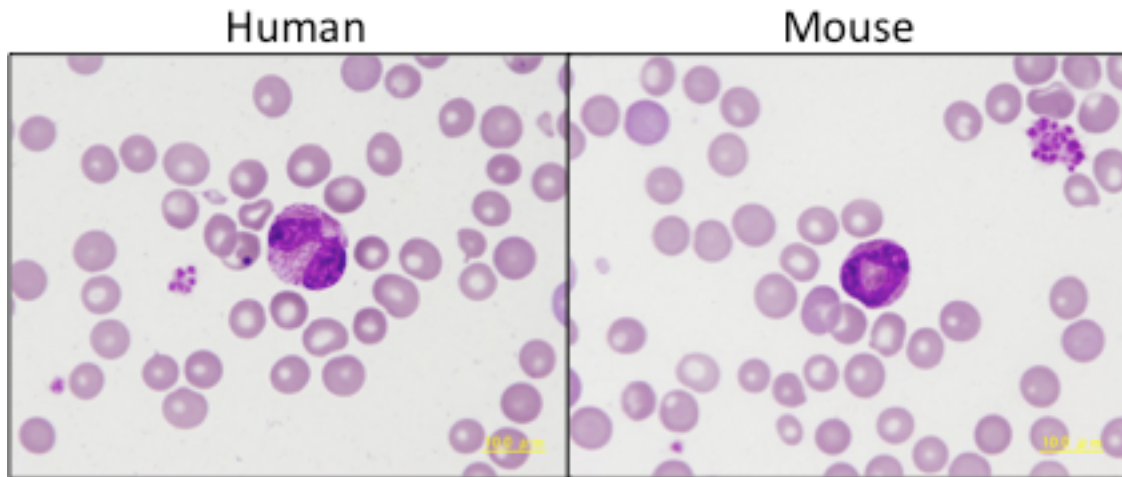

Fig. S1. Morphology of human and mouse eosinophils.

Smear samples of the PB of hu-IL-3/GM Tg mice were stained with May-Giemsa.

Human and mouse eosinophils were detected simultaneously in the Tg mice.

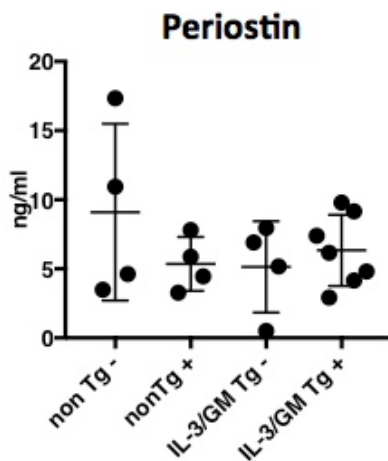

Fig. S2. Serum level of murine periostin.

The level of monomeric periostin in the serum of hu-IL-3/GM Tg and non-Tg mice treated with or without IL-33 was measured by ELISA.

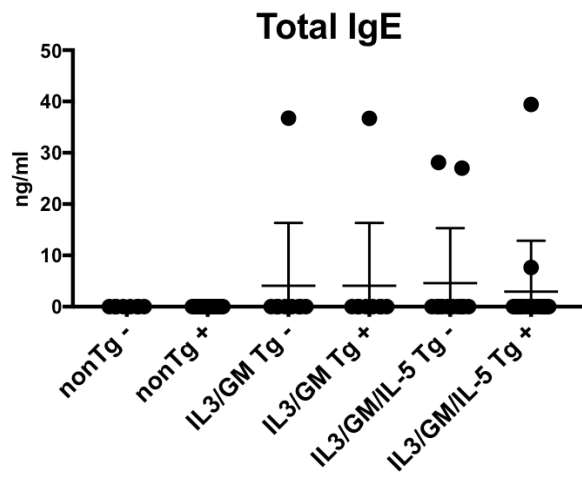

Fig. S3. Total IgE level.

The level of total human IgE in BALF of hu- IL-3/GM/IL-5 triple Tg, hu-IL-3/GM Tg, and non-Tg mice treated with or without IL-33 was measured by ELISA.
